# Supplementary material for: Two-Stage Conversion of High Free Fatty AcidJatropha curcasOil to Biodiesel Using Brønsted Acidic Ionic Liquid and KOH as Catalysts
Source: Hindawi journal article supplement (doi:10.1155/2014/180983), 2014-01-01

**Two stage conversions of high free fatty acid *Jatropha curcas* oil to biodiesel using Brønsted acidic ionic liquid and KOH as catalysts.**

**Subrata Das<sup>\*1</sup>, Ashim Jyoti Thakur<sup>2</sup>, Dhanapati Deka<sup>1</sup>.**

<sup>1</sup>Dept of Energy, Tezpur University, Tezpur- 784028, Assam, India.

<sup>2</sup>Dept of Chemical Sciences, Tezpur University, Tezpur- 784028, Assam, India.

\* Corresponding author. [sdas@tezu.ernet.in](mailto:sdas@tezu.ernet.in). <sup>1</sup>Dept of Energy, Tezpur University, Tezpur- 784028, Assam, India.

Fig S1. <sup>1</sup>HNMR spectrum of Zwitterion.

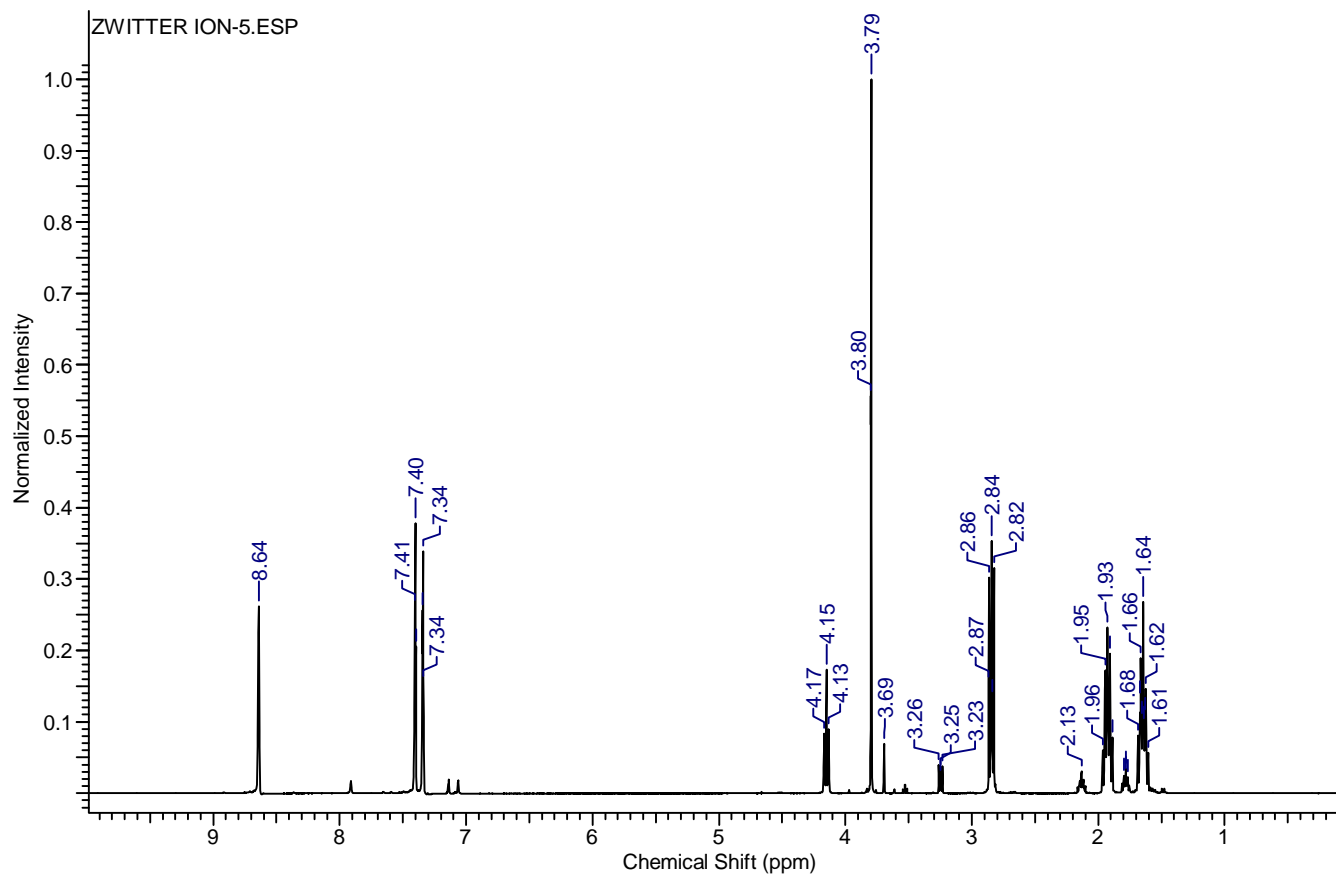

Fig. S2.  $^{13}\text{C}$ NMR of Zwitterion

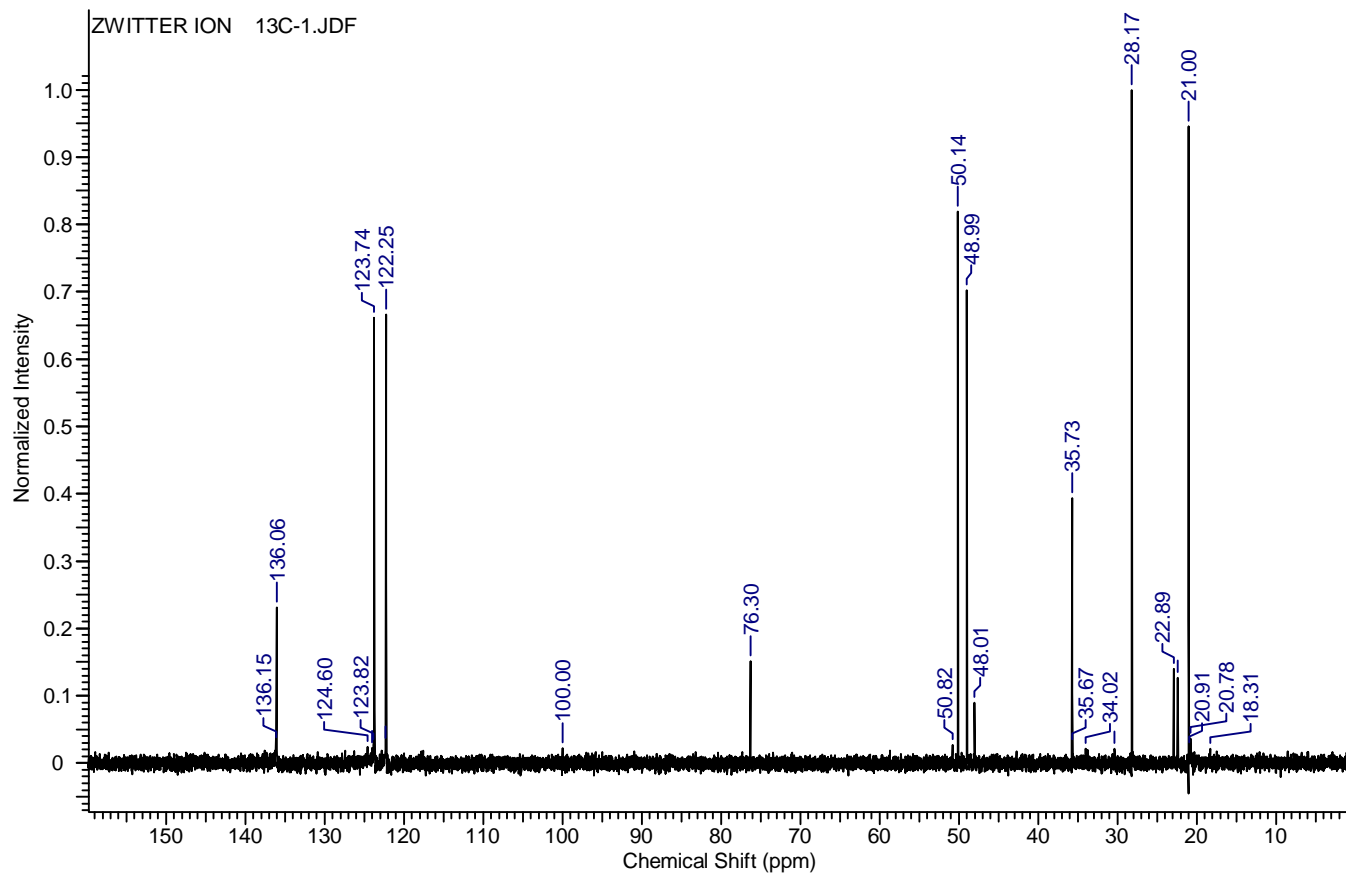

Fig. S3. IR of Zwitterion

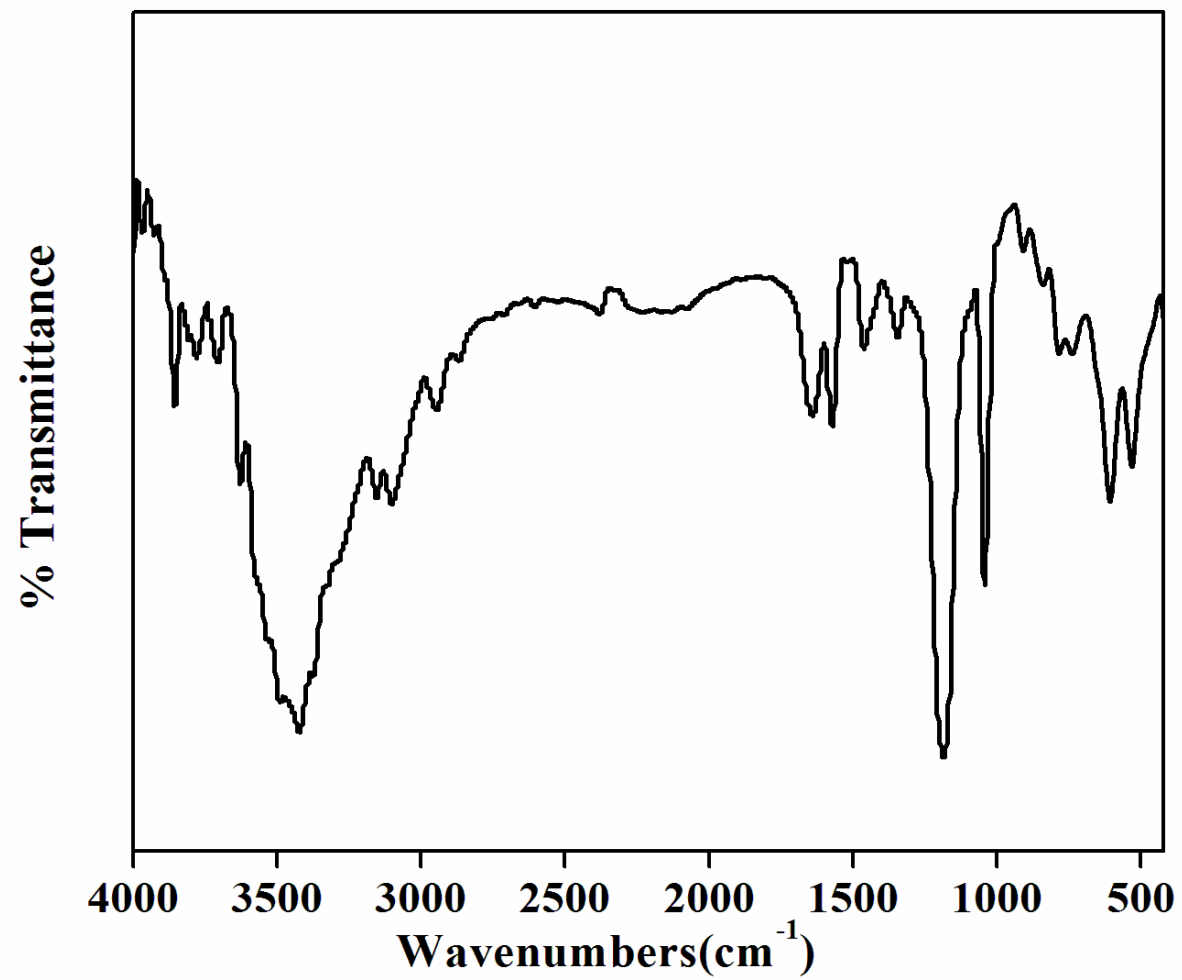

Fig S4  $^1\text{H}$ NMR spectrum of [BSMIM]Cl

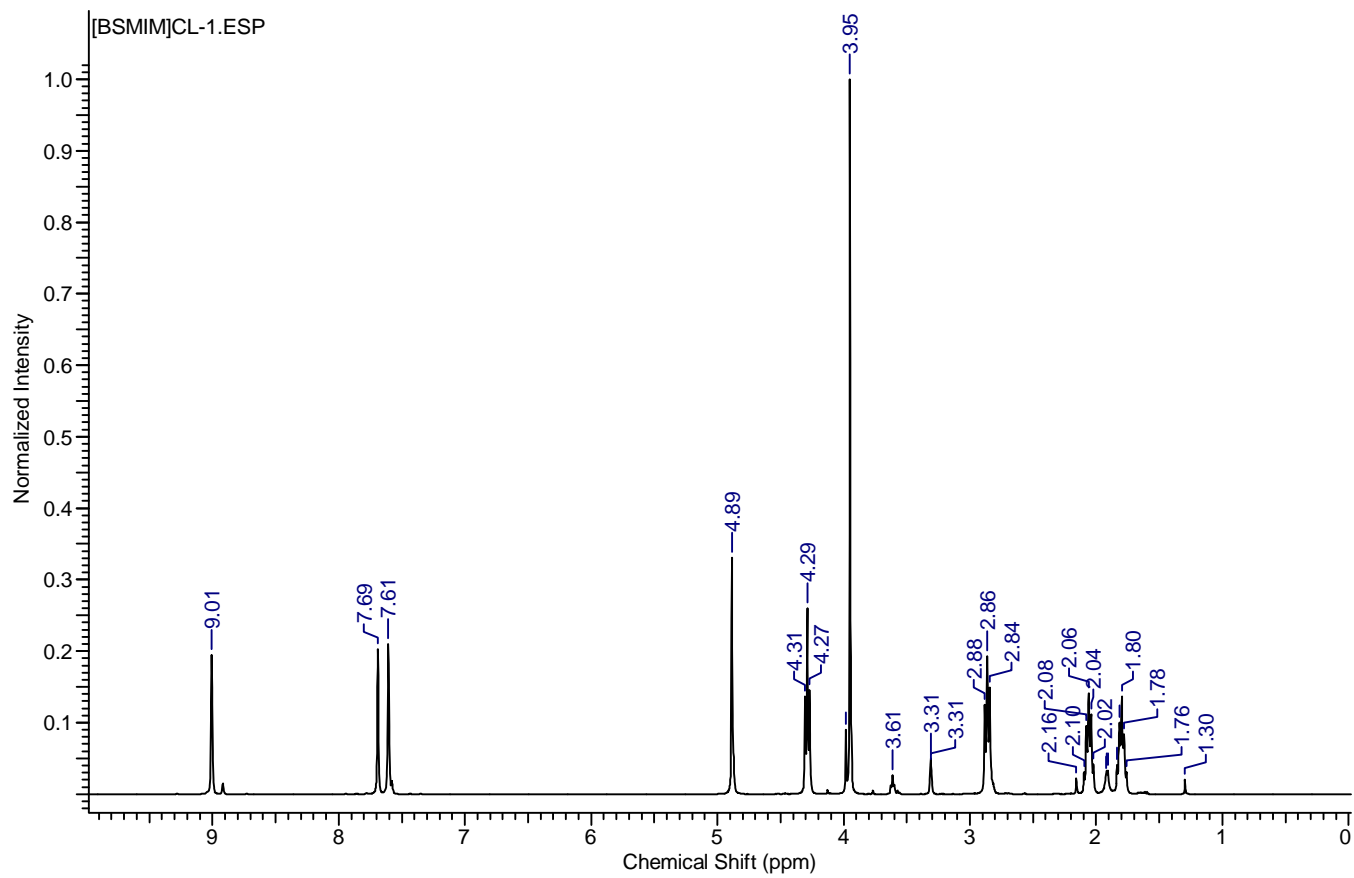

Fig. S5  $^{13}\text{C}$ NMR of [BSMIM]Cl

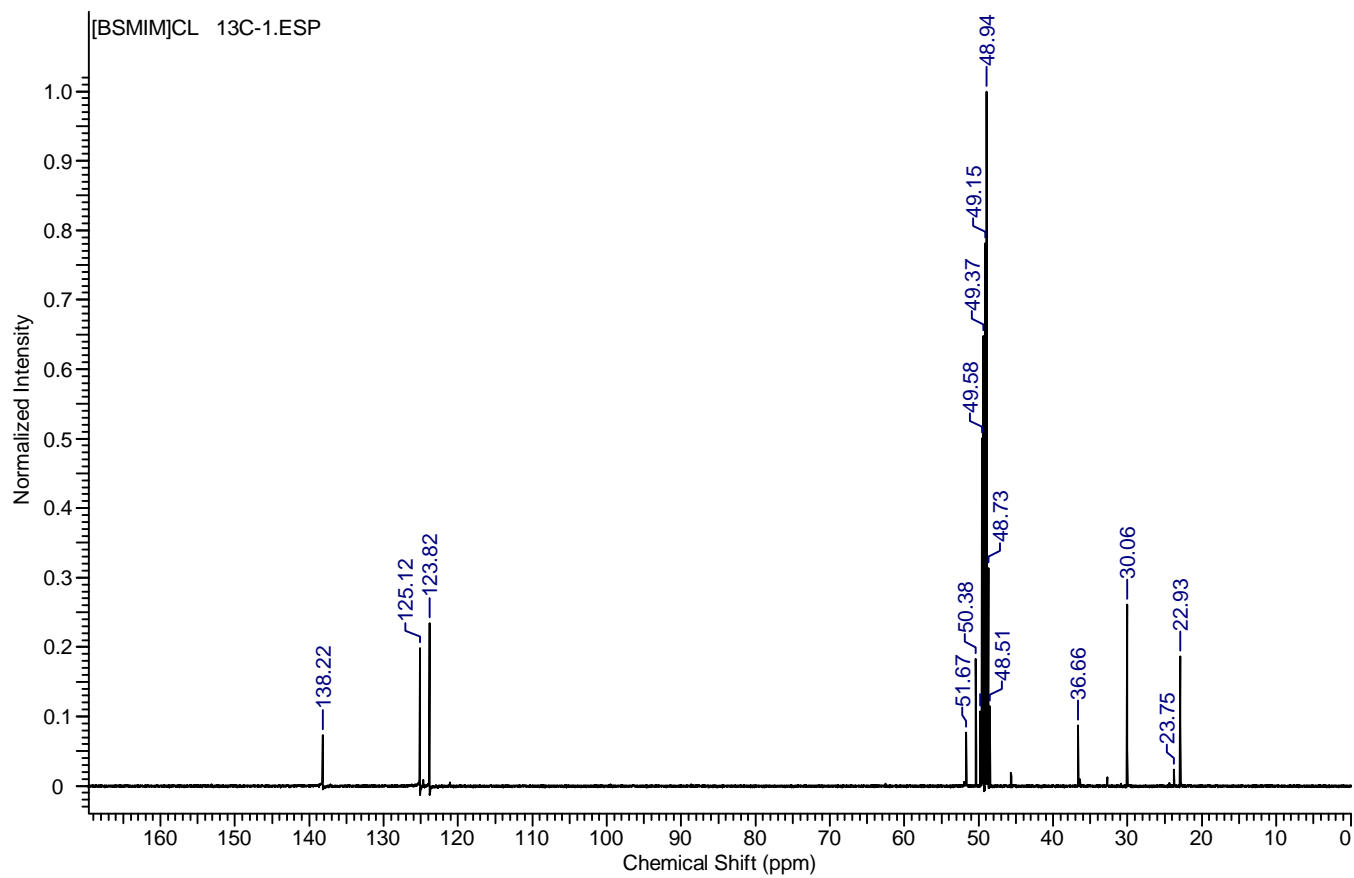

Fig. S6 IR of [BSMIM]Cl

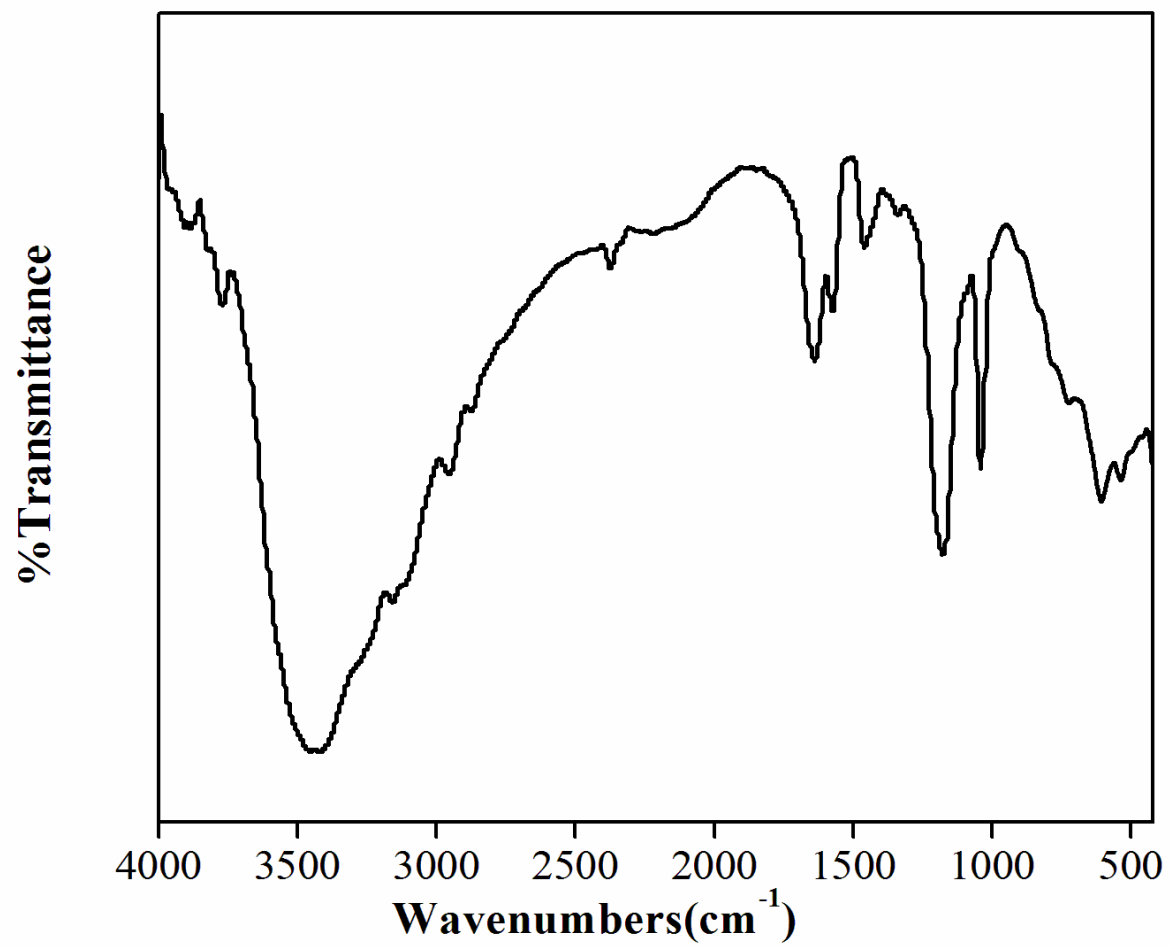

FigS7: ESI-MS of [BSMIM]Cl

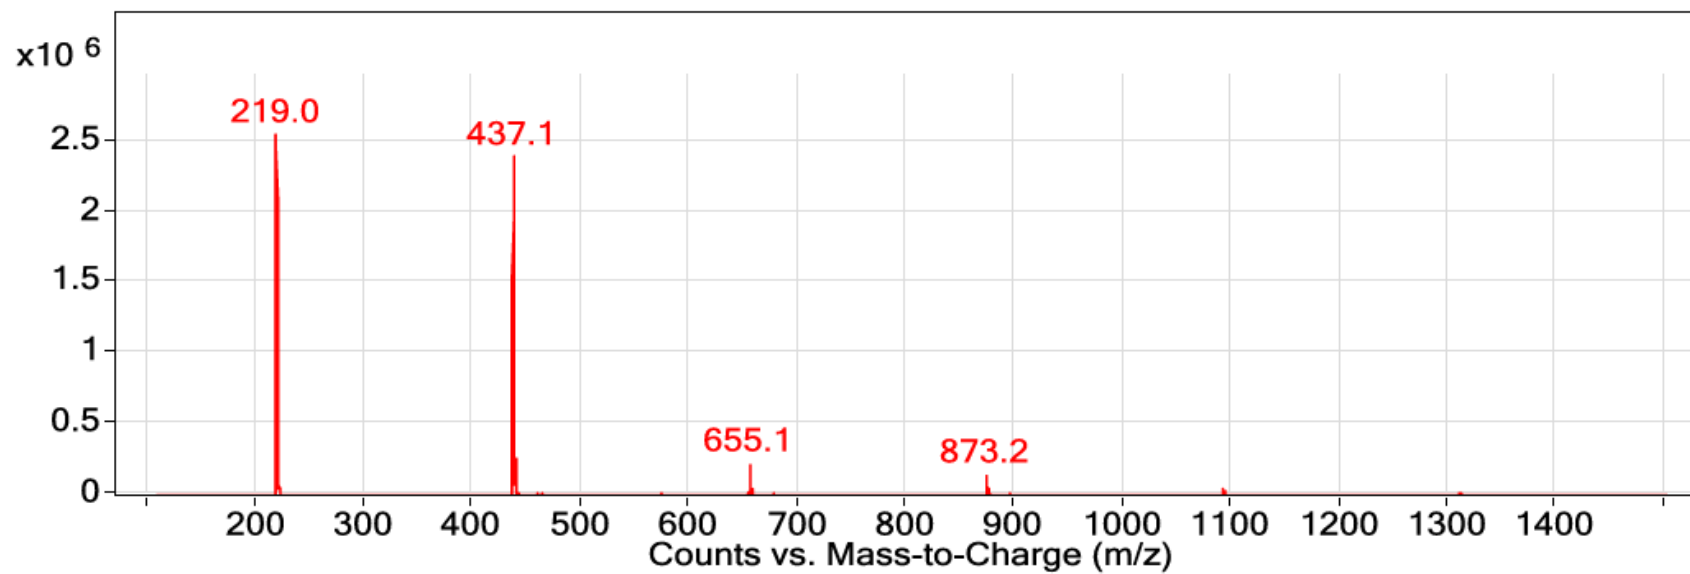



FigS10: TGA of [BSMIM]Cl

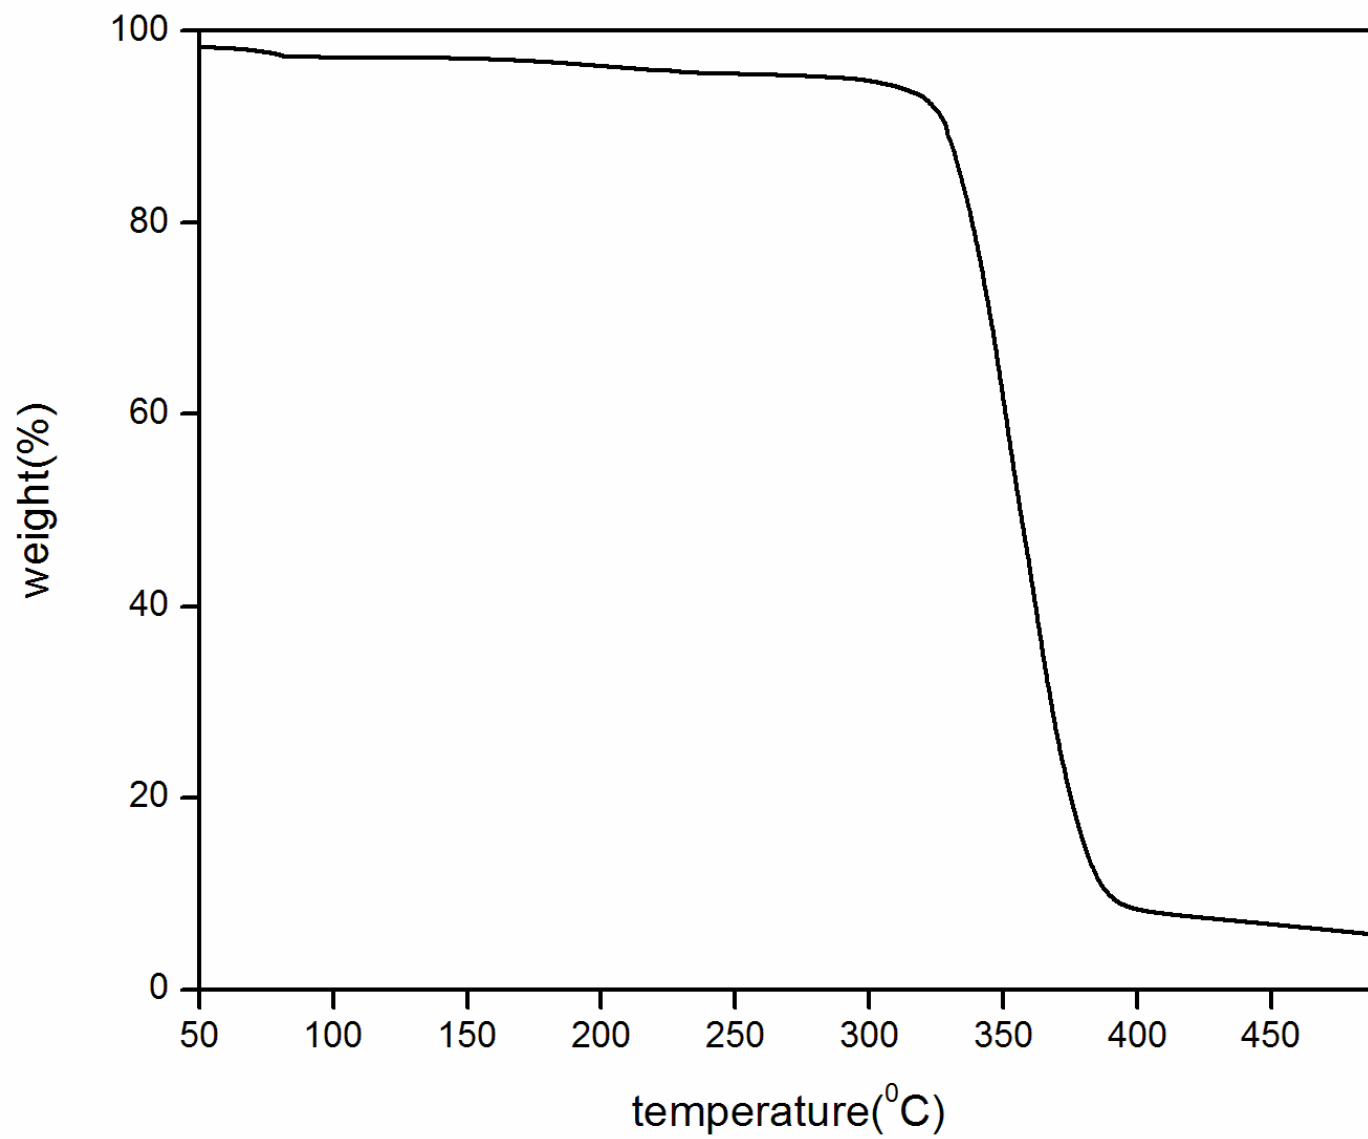

Supplement: f1 [file 180983.f1.pdf]
